# Supplementary material
Source: PubMed Central journal article supplement (PMC5770235)
Supplement: NIHMS929011-supplement.pdf [file NIHMS929011-supplement.pdf]

Fig. 1S

```

DrosophilaPura   MSD-----L--GSGDDGISGSKYNVANMEGSSSRNDFDSSAKGRS
HumanPura        MADRDSGSEQGGAALGSGGSLGHPGSGSGGGGGGGG----GGGGGSGGGGGGAPGGLQ
                *:*                               ***_* .*          *..* .. .: * .

DrosophilaPura   GVEQELATKMLQIQSKRFYLDVKQNRRSRFIKVAEIGADGRRNPILG-SFTAAEFRDHL
HumanPura        HETQELASKRVDIQNKRIFYLDVKQNAKGRFLKIAEVGAGGNKSRLTLSMSVAVEFRDYL
                ****:* ::*_****** :.***:***:*.*.:. :      .******:*.

DrosophilaPura   SFSDYYASLSPQNTDNLPE-----DGKLGSEMMIDKYRRYYLDLKENARGRFLRVSQTIT
HumanPura        DFIEHYAQLGPSQPPDLAQADEPRRALKSEFLVRENKYYMDLKENQRGRFLRIRQTVN
                .* :***_*.*.: :* :          ****::: : *:::***** *****: **:

DrosophilaPura   RGGP----RSQIALPAQGMIEFRDALTDLLEFGANDGGRFKGDLPEERHMKVDNKNFY
HumanPura        RGPGLGSTQGQTIALPAQGLIEFRDALAKLIDYGVEEE---PAELPEGTSLTVDNKRFF
                **          . *****:*****:.*:::*.:. :      .:*** :.****.*:

DrosophilaPura   FDIGQNNRGVYMRRISEVKNNFRITSITPEKWCWIRFRDIFNDYCEKMKKSSDSITAEINLP
HumanPura        FDVGSNKYGVFMRVSEVKPTYRNSITVPYKVKWAKFGHTFCKYSEEMKKIQEKQREKRAAC
                **:*.*: **:*:*:* * .:*.***:* * * :* . * .*:*:* * .: . :

DrosophilaPura   TSSNSLK-----
HumanPura        EQLHQOQOQOQEETAATLLLOGEEEGEED
                . :. :
    
```
